# Supplementary material for: Mycophenolic Acid Derivatives with Immunosuppressive Activity from the Coral-Derived Fungus Penicillium bialowiezense
Source: PubMed Central journal article supplement (PMC6070797; doi:10.3390/md16070230), 2018-07-07
Supplement: marinedrugs-16-00230-s001.pdf [file marinedrugs-16-00230-s001.pdf]

## Supporting Information

# **Mycophenolic Acid Derivatives with Immunosuppressive Activity from the Coral-Derived Fungus *Penicillium bialowiezense***

Qing Zhang, Beiye Yang, Fengli Li, Mengting Liu, Shuang Lin, Jianping Wang, Yongbo Xue, Hucheng Zhu, Weiguang Sun\*, Zhengxi Hu\*, and Yonghui Zhang\*

*Hubei Key Laboratory of Natural Medicinal Chemistry and Resource Evaluation, School of Pharmacy, Tongji*

*Medical College, Huazhong University of Science and Technology, Wuhan 430030, People's Republic of China*

---

\* Corresponding author Tel.: (86) 27-83692892

E-mail: zhangyh@mails.tjmu.edu.cn (Y.Z.); weiguang\_s@hust.edu.cn (W.S.); hzx616@126.com (Z.H.)

## Contents of Supporting Information

|                                                                                                                               |    |
|-------------------------------------------------------------------------------------------------------------------------------|----|
| <b>Figure S1.</b> $^1\text{H}$ NMR spectrum of compound <b>1</b> (Recorded in $\text{CD}_3\text{OD}$ ).....                   | 5  |
| <b>Figure S2.</b> $^{13}\text{C}$ NMR spectrum of compound <b>1</b> (Recorded in $\text{CD}_3\text{OD}$ ) .....               | 6  |
| <b>Figure S3.</b> DEPT spectrum of compound <b>1</b> (Recorded in $\text{CD}_3\text{OD}$ ).....                               | 7  |
| <b>Figure S4.</b> HSQC spectrum of compound <b>1</b> (Recorded in $\text{CD}_3\text{OD}$ ).....                               | 8  |
| <b>Figure S5.</b> HMBC spectrum of compound <b>1</b> (Recorded in $\text{CD}_3\text{OD}$ ).....                               | 9  |
| <b>Figure S6.</b> $^1\text{H}$ - $^1\text{H}$ COSY spectrum of compound <b>1</b> (Recorded in $\text{CD}_3\text{OD}$ ) .....  | 10 |
| <b>Figure S7.</b> HRESIMS spectrum of compound <b>1</b> .....                                                                 | 11 |
| <b>Figure S8.</b> IR spectrum of compound <b>1</b> .....                                                                      | 12 |
| <b>Figure S9.</b> UV spectrum of compound <b>1</b> .....                                                                      | 13 |
| <b>Figure S10.</b> $^1\text{H}$ NMR spectrum of compound <b>2</b> (Recorded in $\text{CD}_3\text{OD}$ ).....                  | 14 |
| <b>Figure S11.</b> $^{13}\text{C}$ NMR spectrum of compound <b>2</b> (Recorded in $\text{CD}_3\text{OD}$ ) .....              | 15 |
| <b>Figure S12.</b> DEPT spectrum of compound <b>2</b> (Recorded in $\text{CD}_3\text{OD}$ ).....                              | 16 |
| <b>Figure S13.</b> HSQC spectrum of compound <b>2</b> (Recorded in $\text{CD}_3\text{OD}$ ).....                              | 17 |
| <b>Figure S14.</b> HMBC spectrum of compound <b>2</b> (Recorded in $\text{CD}_3\text{OD}$ ).....                              | 18 |
| <b>Figure S15.</b> $^1\text{H}$ - $^1\text{H}$ COSY spectrum of compound <b>2</b> (Recorded in $\text{CD}_3\text{OD}$ ) ..... | 19 |
| <b>Figure S16.</b> HRESIMS spectrum of compound <b>2</b> .....                                                                | 20 |
| <b>Figure S17.</b> IR spectrum of compound <b>2</b> .....                                                                     | 21 |
| <b>Figure S18.</b> UV spectrum of compound <b>2</b> .....                                                                     | 22 |
| <b>Figure S19.</b> $^1\text{H}$ NMR spectrum of compound <b>3</b> (Recorded in $\text{CD}_3\text{OD}$ ).....                  | 23 |
| <b>Figure S20.</b> $^{13}\text{C}$ NMR spectrum of compound <b>3</b> (Recorded in $\text{CD}_3\text{OD}$ ) .....              | 24 |
| <b>Figure S21.</b> DEPT spectrum of compound <b>3</b> (Recorded in $\text{CD}_3\text{OD}$ ).....                              | 25 |
| <b>Figure S22.</b> HSQC spectrum of compound <b>3</b> (Recorded in $\text{CD}_3\text{OD}$ ).....                              | 26 |
| <b>Figure S23.</b> HMBC spectrum of compound <b>3</b> (Recorded in $\text{CD}_3\text{OD}$ ).....                              | 27 |
| <b>Figure S24.</b> $^1\text{H}$ - $^1\text{H}$ COSY spectrum of compound <b>3</b> (Recorded in $\text{CD}_3\text{OD}$ ) ..... | 28 |
| <b>Figure S25.</b> HRESIMS spectrum of compound <b>3</b> .....                                                                | 29 |
| <b>Figure S26.</b> IR spectrum of compound <b>3</b> .....                                                                     | 30 |
| <b>Figure S27.</b> UV spectrum of compound <b>3</b> .....                                                                     | 31 |
| <b>Figure S28.</b> $^1\text{H}$ NMR spectrum of compound <b>4</b> (Recorded in $\text{CD}_3\text{OD}$ ).....                  | 32 |
| <b>Figure S29.</b> $^{13}\text{C}$ NMR spectrum of compound <b>4</b> (Recorded in $\text{CD}_3\text{OD}$ ) .....              | 33 |
| <b>Figure S30.</b> HSQC spectrum of compound <b>4</b> (Recorded in $\text{CD}_3\text{OD}$ ).....                              | 34 |
| <b>Figure S31.</b> HMBC spectrum of compound <b>4</b> (Recorded in $\text{CD}_3\text{OD}$ ).....                              | 35 |
| <b>Figure S32.</b> $^1\text{H}$ - $^1\text{H}$ COSY spectrum of compound <b>4</b> (Recorded in $\text{CD}_3\text{OD}$ ) ..... | 36 |
| <b>Figure S33.</b> HRESIMS spectrum of compound <b>4</b> .....                                                                | 37 |
| <b>Figure S34.</b> IR spectrum of compound <b>4</b> .....                                                                     | 38 |
| <b>Figure S35.</b> UV spectrum of compound <b>4</b> .....                                                                     | 39 |
| <b>Figure S36.</b> $^1\text{H}$ NMR spectrum of compound <b>5</b> (Recorded in $\text{CD}_3\text{OD}$ ).....                  | 40 |

|                                                                                                                        |    |
|------------------------------------------------------------------------------------------------------------------------|----|
| <b>Figure S37.</b> $^{13}\text{C}$ NMR spectrum of compound 5 (Recorded in $\text{CD}_3\text{OD}$ ) .....              | 41 |
| <b>Figure S38.</b> DEPT spectrum of compound 5 (Recorded in $\text{CD}_3\text{OD}$ ).....                              | 42 |
| <b>Figure S39.</b> HSQC spectrum of compound 5 (Recorded in $\text{CD}_3\text{OD}$ ).....                              | 43 |
| <b>Figure S40.</b> HMBC spectrum of compound 5 (Recorded in $\text{CD}_3\text{OD}$ ).....                              | 44 |
| <b>Figure S41.</b> $^1\text{H}$ - $^1\text{H}$ COSY spectrum of compound 5 (Recorded in $\text{CD}_3\text{OD}$ ) ..... | 45 |
| <b>Figure S42.</b> HRESIMS spectrum of compound 5.....                                                                 | 46 |
| <b>Figure S43.</b> IR spectrum of compound 5 .....                                                                     | 47 |
| <b>Figure S44.</b> UV spectrum of compound 5 .....                                                                     | 48 |
| <b>Figure S45.</b> $^1\text{H}$ NMR spectrum of compound 6 (Recorded in $\text{CD}_3\text{OD}$ ).....                  | 49 |
| <b>Figure S46.</b> $^{13}\text{C}$ NMR spectrum of compound 6 (Recorded in $\text{CD}_3\text{OD}$ ) .....              | 50 |
| <b>Figure S47.</b> DEPT spectrum of compound 6 (Recorded in $\text{CD}_3\text{OD}$ ).....                              | 51 |
| <b>Figure S48.</b> HSQC spectrum of compound 6 (Recorded in $\text{CD}_3\text{OD}$ ).....                              | 52 |
| <b>Figure S49.</b> HMBC spectrum of compound 6 (Recorded in $\text{CD}_3\text{OD}$ ).....                              | 53 |
| <b>Figure S50.</b> $^1\text{H}$ - $^1\text{H}$ COSY spectrum of compound 6 (Recorded in $\text{CD}_3\text{OD}$ ) ..... | 54 |
| <b>Figure S51.</b> HRESIMS spectrum of compound 6.....                                                                 | 55 |
| <b>Figure S52.</b> IR spectrum of compound 6 .....                                                                     | 56 |
| <b>Figure S53.</b> UV spectrum of compound 6 .....                                                                     | 57 |
| <b>Figure S54.</b> $^1\text{H}$ NMR spectrum of compound 7 (Recorded in $\text{CD}_3\text{OD}$ ).....                  | 58 |
| <b>Figure S55.</b> $^{13}\text{C}$ NMR spectrum of compound 7 (Recorded in $\text{CD}_3\text{OD}$ ) .....              | 59 |
| <b>Figure S56.</b> DEPT spectrum of compound 7 (Recorded in $\text{CD}_3\text{OD}$ ).....                              | 60 |
| <b>Figure S57.</b> HSQC spectrum of compound 7 (Recorded in $\text{CD}_3\text{OD}$ ).....                              | 61 |
| <b>Figure S58.</b> HMBC spectrum of compound 7 (Recorded in $\text{CD}_3\text{OD}$ ).....                              | 62 |
| <b>Figure S59.</b> $^1\text{H}$ - $^1\text{H}$ COSY spectrum of compound 7 (Recorded in $\text{CD}_3\text{OD}$ ) ..... | 63 |
| <b>Figure S60.</b> HRESIMS spectrum of compound 7.....                                                                 | 64 |
| <b>Figure S61.</b> IR spectrum of compound 7 .....                                                                     | 65 |
| <b>Figure S62.</b> UV spectrum of compound 7 .....                                                                     | 66 |
| <b>Figure S63.</b> $^1\text{H}$ NMR spectrum of compound 8 (Recorded in $\text{CD}_3\text{OD}$ ).....                  | 67 |
| <b>Figure S64.</b> $^{13}\text{C}$ NMR spectrum of compound 8 (Recorded in $\text{CD}_3\text{OD}$ ) .....              | 68 |
| <b>Figure S65.</b> DEPT spectrum of compound 8 (Recorded in $\text{CD}_3\text{OD}$ ).....                              | 69 |
| <b>Figure S66.</b> HSQC spectrum of compound 8 (Recorded in $\text{CD}_3\text{OD}$ ).....                              | 70 |
| <b>Figure S67.</b> HMBC spectrum of compound 8 (Recorded in $\text{CD}_3\text{OD}$ ).....                              | 71 |
| <b>Figure S68.</b> $^1\text{H}$ - $^1\text{H}$ COSY spectrum of compound 8 (Recorded in $\text{CD}_3\text{OD}$ ) ..... | 72 |
| <b>Figure S69.</b> HRESIMS spectrum of compound 8.....                                                                 | 73 |
| <b>Figure S70.</b> IR spectrum of compound 8 .....                                                                     | 74 |
| <b>Figure S71.</b> UV spectrum of compound 8 .....                                                                     | 75 |
| <b>Figure S72.</b> $^1\text{H}$ NMR spectrum of compound 9 (Recorded in $\text{CD}_3\text{OD}$ ).....                  | 76 |
| <b>Figure S73.</b> $^{13}\text{C}$ NMR spectrum of compound 9 (Recorded in $\text{CD}_3\text{OD}$ ) .....              | 77 |
| <b>Figure S74.</b> DEPT spectrum of compound 9 (Recorded in $\text{CD}_3\text{OD}$ ).....                              | 78 |

|                                                                                                                              |    |
|------------------------------------------------------------------------------------------------------------------------------|----|
| <b>Figure S75.</b> HSQC spectrum of compound <b>9</b> (Recorded in CD <sub>3</sub> OD).....                                  | 79 |
| <b>Figure S76.</b> HMBC spectrum of compound <b>9</b> (Recorded in CD <sub>3</sub> OD).....                                  | 80 |
| <b>Figure S77.</b> <sup>1</sup> H– <sup>1</sup> H COSY spectrum of compound <b>9</b> (Recorded in CD <sub>3</sub> OD) .....  | 81 |
| <b>Figure S78.</b> HRESIMS spectrum of compound <b>9</b> .....                                                               | 82 |
| <b>Figure S79.</b> IR spectrum of compound <b>9</b> .....                                                                    | 83 |
| <b>Figure S80.</b> UV spectrum of compound <b>9</b> .....                                                                    | 84 |
| <b>Figure S81.</b> <sup>1</sup> H NMR spectrum of compound <b>10</b> (Recorded in CD <sub>3</sub> OD).....                   | 85 |
| <b>Figure S82.</b> <sup>13</sup> C NMR spectrum of compound <b>10</b> (Recorded in CD <sub>3</sub> OD) .....                 | 86 |
| <b>Figure S83.</b> DEPT spectrum of compound <b>10</b> (Recorded in CD <sub>3</sub> OD).....                                 | 87 |
| <b>Figure S84.</b> HSQC spectrum of compound <b>10</b> (Recorded in CD <sub>3</sub> OD).....                                 | 88 |
| <b>Figure S85.</b> HMBC spectrum of compound <b>10</b> (Recorded in CD <sub>3</sub> OD).....                                 | 89 |
| <b>Figure S86.</b> <sup>1</sup> H– <sup>1</sup> H COSY spectrum of compound <b>10</b> (Recorded in CD <sub>3</sub> OD) ..... | 90 |
| <b>Figure S87.</b> HRESIMS spectrum of compound <b>10</b> .....                                                              | 91 |
| <b>Figure S88.</b> IR spectrum of compound <b>10</b> .....                                                                   | 92 |
| <b>Figure S89.</b> UV spectrum of compound <b>10</b> .....                                                                   | 93 |
| <b>Structure elucidation of compounds 1, 2, and 8–10</b> .....                                                               | 94 |
| <b>The physical and chemical constants of compounds 1, 2, and 8–10</b> .....                                                 | 96 |
| <b><sup>1</sup>H and <sup>13</sup>C NMR data for compounds 1, 2, and 8–10</b> .....                                          | 97 |



**Figure S1.** <sup>1</sup>H NMR spectrum of compound 1 (Recorded in CD<sub>3</sub>OD)



Figure S2.  $^{13}\text{C}$  NMR spectrum of compound 1 (Recorded in  $\text{CD}_3\text{OD}$ )



Figure S3. DEPT spectrum of compound 1 (Recorded in CD<sub>3</sub>OD)



Figure S4. HSQC spectrum of compound 1 (Recorded in CD<sub>3</sub>OD)



**Figure S5.** HMBC spectrum of compound **1** (Recorded in CD<sub>3</sub>OD)



**Figure S6.**  $^1\text{H}$ - $^1\text{H}$  COSY spectrum of compound **1** (Recorded in  $\text{CD}_3\text{OD}$ )



Figure S7. HRESIMS spectrum of compound 1



E:\20170419\lyby\13.0



Figure S8. IR spectrum of compound 1



Figure S9. UV spectrum of compound 1



Figure S10. <sup>1</sup>H NMR spectrum of compound 2 (Recorded in CD<sub>3</sub>OD)



**Figure S11.** <sup>13</sup>C NMR spectrum of compound 2 (Recorded in CD<sub>3</sub>OD)



Figure S12. DEPT spectrum of compound 2 (Recorded in CD<sub>3</sub>OD)



S17 of S98



Figure S13. HSQC spectrum of compound 2 (Recorded in  $\text{CD}_3\text{OD}$ )



S18 of S98



Figure S14. HMBC spectrum of compound 2 (Recorded in CD<sub>3</sub>OD)



S19 of S98



**Figure S15.**  $^1\text{H}$ - $^1\text{H}$  COSY spectrum of compound 2 (Recorded in  $\text{CD}_3\text{OD}$ )



Figure S16. HRESIMS spectrum of compound 2

E:\20170912\20170912同济\YBY-2.0

17:21:22 2017-9-12



Figure S17. IR spectrum of compound 2



Figure S18. UV spectrum of compound 2



Figure S19. <sup>1</sup>H NMR spectrum of compound 3 (Recorded in CD<sub>3</sub>OD)



Figure S20. <sup>13</sup>C NMR spectrum of compound 3 (Recorded in CD<sub>3</sub>OD)



**Figure S21.** DEPT spectrum of compound 3 (Recorded in CD<sub>3</sub>OD)



S26 of S98



**Figure S22.** HSQC spectrum of compound 3 (Recorded in CD<sub>3</sub>OD)



S27 of S98



**Figure S23.** HMBC spectrum of compound **3** (Recorded in CD<sub>3</sub>OD)



**Figure S24.** <sup>1</sup>H-<sup>1</sup>H COSY spectrum of compound 3 (Recorded in CD<sub>3</sub>OD)



Figure S25. HRESIMS spectrum of compound 3



E:\20170419\yby\12.0



Figure S26. IR spectrum of compound 3



Figure S27. UV spectrum of compound 3



**Figure S28.** <sup>1</sup>H NMR spectrum of compound 4 (Recorded in CD<sub>3</sub>OD)



**Figure S29.** <sup>13</sup>C NMR spectrum of compound 4 (Recorded in CD<sub>3</sub>OD)



Figure S30. HSQC spectrum of compound 4 (Recorded in CD<sub>3</sub>OD)



Figure S31. HMBC spectrum of compound 4 (Recorded in CD<sub>3</sub>OD)



S36 of S98



**Figure S32.**  $^1\text{H}$ - $^1\text{H}$  COSY spectrum of compound **4** (Recorded in  $\text{CD}_3\text{OD}$ )



Figure S33. HRESIMS spectrum of compound 4



E:\20170419\lyby\9.0



Figure S34. IR spectrum of compound 4



Figure S35. UV spectrum of compound 4



Figure S36. <sup>1</sup>H NMR spectrum of compound 5 (Recorded in CD<sub>3</sub>OD)



Figure S37.  $^{13}\text{C}$  NMR spectrum of compound 5 (Recorded in  $\text{CD}_3\text{OD}$ )



Figure S38. DEPT spectrum of compound 5 (Recorded in CD<sub>3</sub>OD)



Figure S39. HSQC spectrum of compound 5 (Recorded in CD<sub>3</sub>OD)



Figure S40. HMBC spectrum of compound 5 (Recorded in CD<sub>3</sub>OD)



**Figure S41.** <sup>1</sup>H-<sup>1</sup>H COSY spectrum of compound 5 (Recorded in CD<sub>3</sub>OD)



Figure S42. HRESIMS spectrum of compound 5



E:\20170419\yby\22.0



Figure S43. IR spectrum of compound 5



Figure S44. UV spectrum of compound 5



Figure S45. <sup>1</sup>H NMR spectrum of compound 6 (Recorded in CD<sub>3</sub>OD)



Figure S46.  $^{13}\text{C}$  NMR spectrum of compound 6 (Recorded in  $\text{CD}_3\text{OD}$ )



Figure S47. DEPT spectrum of compound 6 (Recorded in CD<sub>3</sub>OD)



**Figure S48.** HSQC spectrum of compound **6** (Recorded in CD<sub>3</sub>OD)



**Figure S49.** HMBC spectrum of compound **6** (Recorded in CD<sub>3</sub>OD)



**Figure S50.** <sup>1</sup>H-<sup>1</sup>H COSY spectrum of compound 6 (Recorded in CD<sub>3</sub>OD)



Figure S51. HRESIMS spectrum of compound 6



E:\20170419\lyby\35.0



Figure S52. IR spectrum of compound 6



Figure S53. UV spectrum of compound 6



Figure S54. <sup>1</sup>H NMR spectrum of compound 7 (Recorded in CD<sub>3</sub>OD)



Figure S55. <sup>13</sup>C NMR spectrum of compound 7 (Recorded in CD<sub>3</sub>OD)



Figure S56. DEPT spectrum of compound 7 (Recorded in CD<sub>3</sub>OD)



**Figure S57.** HSQC spectrum of compound 7 (Recorded in CD<sub>3</sub>OD)



S62 of S98



Figure S58. HMBC spectrum of compound 7 (Recorded in CD<sub>3</sub>OD)



S63 of S98



**Figure S59.**  $^1\text{H}$ - $^1\text{H}$  COSY spectrum of compound 7 (Recorded in  $\text{CD}_3\text{OD}$ )



Figure S60. HRESIMS spectrum of compound 7





E:\20170419\yby\48.0



Figure S61. IR spectrum of compound 7



Figure S62. UV spectrum of compound 7



Figure S63. <sup>1</sup>H NMR spectrum of compound 8 (Recorded in CD<sub>3</sub>OD)



Figure S64. <sup>13</sup>C NMR spectrum of compound 8 (Recorded in CD<sub>3</sub>OD)



Figure S65. DEPT spectrum of compound 8 (Recorded in CD<sub>3</sub>OD)



**Figure S66.** HSQC spectrum of compound 8 (Recorded in  $\text{CD}_3\text{OD}$ )



S71 of S98



**Figure S67.** HMBC spectrum of compound **8** (Recorded in CD<sub>3</sub>OD)



S72 of S98



**Figure S68.**  $^1\text{H}$ - $^1\text{H}$  COSY spectrum of compound **8** (Recorded in  $\text{CD}_3\text{OD}$ )



Figure S69. HRESIMS spectrum of compound 8



E:\20170419\yby\28.0



Figure S70. IR spectrum of compound 8



Figure S71. UV spectrum of compound 8



**Figure S72.** <sup>1</sup>H NMR spectrum of compound 9 (Recorded in CD<sub>3</sub>OD)



Figure S73. <sup>13</sup>C NMR spectrum of compound 9 (Recorded in CD<sub>3</sub>OD)



Figure S74. DEPT spectrum of compound 9 (Recorded in CD<sub>3</sub>OD)



Figure S75. HSQC spectrum of compound 9 (Recorded in CD<sub>3</sub>OD)



S80 of S98



Figure S76. HMBC spectrum of compound 9 (Recorded in CD<sub>3</sub>OD)



S81 of S98



Figure S77.  $^1\text{H}$ - $^1\text{H}$  COSY spectrum of compound 9 (Recorded in  $\text{CD}_3\text{OD}$ )



Figure S78. HRESIMS spectrum of compound 9



E:\20170419\yby\46.0



Figure S79. IR spectrum of compound 9



Figure S80. UV spectrum of compound 9



**Figure S81.** <sup>1</sup>H NMR spectrum of compound 10 (Recorded in CD<sub>3</sub>OD)



**Figure S82.** <sup>13</sup>C NMR spectrum of compound 10 (Recorded in CD<sub>3</sub>OD)



Figure S83. DEPT spectrum of compound 10 (Recorded in CD<sub>3</sub>OD)



Figure S84. HSQC spectrum of compound 10 (Recorded in CD<sub>3</sub>OD)



Figure S85. HMBC spectrum of compound 10 (Recorded in  $\text{CD}_3\text{OD}$ )



S90 of S98

10



Figure S86.  $^1\text{H}$ - $^1\text{H}$  COSY spectrum of compound 10 (Recorded in  $\text{CD}_3\text{OD}$ )



Figure S87. HRESIMS spectrum of compound 10



E:\20170419\lyby\49.0



Figure S88. IR spectrum of compound 10



Figure S89. UV spectrum of compound 10

## Structure elucidation of compounds 1, 2, and 8–10

Compound **1** was isolated as a white powder, and its molecular formula was assigned as  $C_{18}H_{22}O_7$ , based on the HRESIMS data at  $m/z$  373.1259 ( $[M + Na]^+$ , calcd for 373.1263) and  $^{13}C$  NMR data, requiring eight indices of hydrogen deficiency. Detailed analysis of the  $^1H$  and  $^{13}C$  NMR data (Table S1) of **1** and **11** suggested that both compounds possessed the similar structural features, with the only difference that a methyl group at C-8 in **11** was replaced by a  $-CH_2OCH_3$  group in **1**, as supported by the HMBC correlations from H-8 to C-3a ( $\delta_c$  147.2), C-4 ( $\delta_c$  119.1), C-5 ( $\delta_c$  164.5), and the methoxyl carbon ( $\delta_c$  58.7). Moreover, the planar structure was defined by the 2D NMR analysis, including HMBC and  $^1H$ - $^1H$  COSY correlations. Thus, the structure of **1** was identified and named 8-*O*-methyl mycophenolic acid.

Compound **2** was also isolated as a white powder. Its molecular formula  $C_{17}H_{20}O_7$  was determined by the HRESIMS  $m/z$  359.1092  $[M + Na]^+$  (calcd for  $C_{17}H_{20}O_7Na$ , 359.1107). The  $^1H$  and  $^{13}C$  NMR data (Table S1) showed high similarity to those of **11**, differing in that the C-3 methylene in **11** was hydroxylated in **2**, as verified by its molecular formula and the chemical shift values of CH-3 ( $\delta_H$  6.58;  $\delta_c$  100.2). This conclusion was further confirmed by the HMBC correlations from H-3 to C-1 ( $\delta_c$  171.6), C-3a ( $\delta_c$  145.7), C-4 ( $\delta_c$  120.3), and C-7a ( $\delta_c$  108.7). Compound **2** was optically inactive and no apparent Cotton effects were observed in its experimental CD spectrum despite the presence of an  $\alpha,\beta$ -unsaturated carbonyl chromophore, suggesting that it was a racemic mixture. Moreover, an attempt to separate the two enantiomers was failed. Thus, the structure of **2** was defined and named 3-hydroxy mycophenolic acid.

Compound **8** was determined to have the molecular formula  $C_{22}H_{29}NO_7$ , according to its HRESIMS  $m/z$  442.1851  $[M + Na]^+$  (calcd for  $C_{22}H_{29}NO_7Na$ , 442.1842). The  $^1H$  and  $^{13}C$  NMR data (Table S2) were similar to those of **11**, except for the presence the valine residue which formed an amide bond with C-6', as supported by the COSY correlations from H-2'' ( $\delta_H$  4.24) to H-4'' ( $\delta_H$  2.10) and from H-4'' to H-5'' ( $\delta_H$  0.90) and H-6'' ( $\delta_H$  0.90) and HMBC correlations from H-2'' to C-6' and C-3'' and from H-4'' to C-3''. The specific rotation of **8**  $\{[\alpha]_D^{23}: +5.3$  ( $c$  0.08, MeOH) $\}$  was dextrorotatory, the same to that of the synthetic product *N*-mycophenoyl-*L*-valine  $\{[\alpha]_D^{25}: +2.0$  ( $c$  1, acetone) $\}$  [1], suggesting the presence of a *L*-valine in **8**. Thus, the structure of **8** was identified as *N*-mycophenoyl-*L*-valine.

Compounds **9** and **10** were also identified as the natural mycophenolic acid-amino acid conjugates. And their molecular formulas were determined to be  $C_{26}H_{29}NO_7$  and  $C_{20}H_{25}NO_7$ , respectively, based on the HRESIMS analysis as well as  $^{13}C$  NMR data. Detailed analysis of the 1D and 2D NMR data (Table S2) of **9** and **10** with those of **8** revealed the obvious differences that **9** had a phenylalanine amide unit and **10** had an alanine amide unit, as supported by the key 2D NMR analysis. Compound **9** was measured with a specific rotation,  $[\alpha]_D^{23}: +2.5$  ( $c$  0.1, MeOH), which was identical to that of the synthetic product *N*-mycophenoyl-*L*-phenylalanine  $\{[\alpha]_D^{25}: +2.0$  ( $c$  1, MeOH) $\}$  [1], suggesting the presence of a *L*-phenylalanine amide unit

in **9**. Similarly, comparing the specific rotation of **10**  $\{[\alpha]_D^{25}: -6.4 (c 0.08, \text{MeOH})\}$  with that of the synthetic product *N*-mycophenoyl-L-alanine  $\{[\alpha]_D^{25}: -2.0 (c 1, \text{acetone})\}$  [1], the similar negative values indicated the presence of a L-alanine amide unit in **10**. Thus, the structures of **9** and **10** were defined and named *N*-mycophenoyl-L-phenylalanine and *N*-mycophenoyl-L-alanine, respectively.



**Figure S90.** Key  $^1\text{H}$ - $^1\text{H}$  COSY (pink lines) and HMBC (blue arrows) correlations of **1**-**2** and **8**-**10**.

Ref: [1] Iwaszkiewicz-Grzes, D.; Cholewinski, G.; Kot-Wasik, A.; Trzonkowski, P.; Dzierzbicka, K. Synthesis and biological activity of mycophenolic acid-amino acid derivatives. *Eur. J. Med. Chem.* **2013**, *69*, 863–871.

## The physical and chemical constants of compounds 1, 2, and 8–10

**8-O-Methyl mycophenolic acid (1):** white powder; UV (MeOH)  $\lambda_{\max}$  (log  $\epsilon$ ): 219 (4.57), 253 (3.81), and 305 (3.51) nm; IR ( $\nu_{\max}$ ): 3424, 2924, 2853, 1738, 1618, 1453, 1421, 1381, 1273, 1109, 1028, 969, 674  $\text{cm}^{-1}$ ; HRESIMS  $m/z$  373.1259 [M + Na]<sup>+</sup> (calcd for C<sub>18</sub>H<sub>22</sub>O<sub>7</sub>Na, 373.1263); <sup>1</sup>H and <sup>13</sup>C NMR data, see Table S1.

**3-Hydroxy mycophenolic acid (2):** white powder;  $[\alpha]_{\text{D}}^{23}$ : 0 (*c* 0.15, MeOH); UV (MeOH)  $\lambda_{\max}$  (log  $\epsilon$ ): 218 (4.41), 251 (3.73), and 311 (3.56) nm; IR ( $\nu_{\max}$ ): 3436, 2947, 1737, 1626, 1460, 1408, 1276, 1138, 1092, 1024, 595  $\text{cm}^{-1}$ ; HRESIMS  $m/z$  359.1092 [M + Na]<sup>+</sup> (calcd for C<sub>17</sub>H<sub>20</sub>O<sub>7</sub>Na, 359.1107); <sup>1</sup>H and <sup>13</sup>C NMR data, see Table S1.

**N-Mycophenoyl-L-valine (8):** white powder;  $[\alpha]_{\text{D}}^{23}$ : +5.3 (*c* 0.08, MeOH); UV (MeOH)  $\lambda_{\max}$  (log  $\epsilon$ ): 217 (4.24), 251 (3.49), and 307 (3.16) nm; IR ( $\nu_{\max}$ ): 3430, 2924, 2853, 1738, 1633, 1463, 1416, 1384, 1136, 1078, 1030, 973, 673  $\text{cm}^{-1}$ ; HRESIMS  $m/z$  442.1851 [M + Na]<sup>+</sup> (calcd for C<sub>22</sub>H<sub>29</sub>NO<sub>7</sub>Na, 442.1842); <sup>1</sup>H and <sup>13</sup>C NMR data, see Table S2.

**N-Mycophenoyl-L-phenyloalanine (9):** white powder;  $[\alpha]_{\text{D}}^{23}$ : +2.5 (*c* 0.1, MeOH); UV (MeOH)  $\lambda_{\max}$  (log  $\epsilon$ ): 215 (4.39), 253 (3.64), and 308 (3.17) nm; IR ( $\nu_{\max}$ ): 3423, 2924, 2853, 1737, 1633, 1452, 1412, 1330, 1136, 1079, 1031, 971, 702, 583  $\text{cm}^{-1}$ ; HRESIMS  $m/z$  490.1875 [M + Na]<sup>+</sup> (calcd for C<sub>26</sub>H<sub>29</sub>NO<sub>7</sub>Na, 490.1842); <sup>1</sup>H and <sup>13</sup>C NMR data, see Table S2.

**N-Mycophenoyl-L-alanine (10):** white powder,  $[\alpha]_{\text{D}}^{23}$ : -6.4 (*c* 0.08, MeOH); UV (MeOH)  $\lambda_{\max}$  (log  $\epsilon$ ): 218 (4.29), 253 (3.58), and 307 (3.16) nm; IR ( $\nu_{\max}$ ): 3427, 2924, 2853, 1738, 1631, 1458, 1414, 1383, 1136, 1080, 1031, 972  $\text{cm}^{-1}$ ; HRESIMS  $m/z$  414.1501 [M + Na]<sup>+</sup> (calcd for C<sub>20</sub>H<sub>25</sub>NO<sub>7</sub>Na, 414.1529); <sup>1</sup>H and <sup>13</sup>C NMR data, see Table S2.

## <sup>1</sup>H and <sup>13</sup>C NMR data for compounds 1, 2, and 8–10

**Table S1.** <sup>1</sup>H and <sup>13</sup>C NMR data for 1 and 2 in CD<sub>3</sub>OD ( $\delta$  in ppm,  $J$  in Hz).

| No.    | 1                          |                       | 2                             |                       |
|--------|----------------------------|-----------------------|-------------------------------|-----------------------|
|        | $\delta_{\text{H}}^{a,b}$  | $\delta_{\text{C}}^c$ | $\delta_{\text{H}}^{a,b}$     | $\delta_{\text{C}}^c$ |
| 1      | -                          | 173.6 CO              | -                             | 171.6 CO              |
| 3      | 5.33 (2H, s)               | 71.4 CH <sub>2</sub>  | 6.58 (1H, s)                  | 100.2 CH              |
| 3a     | -                          | 147.2 C               | -                             | 145.7 C               |
| 4      | -                          | 119.1 C               | -                             | 120.3 C               |
| 5      | -                          | 164.5 C               | -                             | 165.2 C               |
| 6      | -                          | 123.8 C               | -                             | 125.5 C               |
| 7      | -                          | 156.6 C               | -                             | 154.4 C               |
| 7a     | -                          | 108.3 C               | -                             | 108.7 C               |
| 8      | 4.52 (2H, s)               | 68.1 CH <sub>2</sub>  | 2.25 (3H, s)                  | 11.1 CH <sub>3</sub>  |
| 3-OMe  | -                          | -                     | -                             | -                     |
| 5-OMe  | 3.78 (3H, s)               | 63.0 CH <sub>3</sub>  | 3.76 (3H, s)                  | 61.5 CH <sub>3</sub>  |
| 8-OMe  | 3.39 (3H, s)               | 58.7 CH <sub>3</sub>  | -                             | -                     |
| 1'     | 3.39 (2H, m)               | 23.5 CH <sub>2</sub>  | 3.39 (2H, br d, $J = 6.9$ Hz) | 23.7 CH <sub>2</sub>  |
| 2'     | 5.26 (1H, t, $J = 7.0$ Hz) | 124.0 CH              | 5.25 (1H, t, $J = 6.9$ Hz)    | 124.1 CH              |
| 3'     | -                          | 135.4 C               | -                             | 135.2 C               |
| 4'     | 2.27 (2H, m)               | 36.0 CH <sub>2</sub>  | 2.26 (2H, m)                  | 35.8 CH <sub>2</sub>  |
| 5'     | 2.34 (2H, m)               | 34.4 CH <sub>2</sub>  | 2.35 (2H, m)                  | 33.9 CH <sub>2</sub>  |
| 6'     | -                          | 178.1 C               | -                             | 177.3 C               |
| 7'     | 1.81 (3H, s)               | 16.3 CH <sub>3</sub>  | 1.81 (3H, s)                  | 16.3 CH <sub>3</sub>  |
| 6'-OMe | -                          | -                     | -                             | -                     |

<sup>a</sup> Recorded at 400 MHz; <sup>b</sup> "m" means overlapped or multiplet with other signals; <sup>c</sup> Recorded at 100 MHz.

**Table S2.** <sup>1</sup>H and <sup>13</sup>C NMR data for 8–10 in CD<sub>3</sub>OD (δ in ppm, J in Hz).

| No.   | 8                             |                             | 9                                                                |                             | 10                            |                             |
|-------|-------------------------------|-----------------------------|------------------------------------------------------------------|-----------------------------|-------------------------------|-----------------------------|
|       | δ <sub>H</sub> <sup>a,b</sup> | δ <sub>C</sub> <sup>c</sup> | δ <sub>H</sub> <sup>a,b</sup>                                    | δ <sub>C</sub> <sup>c</sup> | δ <sub>H</sub> <sup>a,b</sup> | δ <sub>C</sub> <sup>c</sup> |
| 1     | -                             | 173.8 C                     | -                                                                | 173.9 C                     | -                             | 173.8 C                     |
| 3     | 5.24 (2H, s)                  | 70.8 CH <sub>2</sub>        | 5.10 (2H, s)                                                     | 70.8 CH <sub>2</sub>        | 5.24 (2H, s)                  | 70.8 CH <sub>2</sub>        |
| 3a    | -                             | 146.6 C                     | -                                                                | 146.6 C                     | -                             | 146.6 C                     |
| 4     | -                             | 117.8 C                     | -                                                                | 117.8 C                     | -                             | 117.8 C                     |
| 5     | -                             | 164.9 C                     | -                                                                | 164.8 C                     | -                             | 164.8 C                     |
| 6     | -                             | 123.7 C                     | -                                                                | 123.7 C                     | -                             | 123.7 C                     |
| 7     | -                             | 154.7 C                     | -                                                                | 154.8 C                     | -                             | 154.6 C                     |
| 7a    | -                             | 107.7 C                     | -                                                                | 107.7 C                     | -                             | 107.7 C                     |
| 8     | 2.14 (3H, s)                  | 11.4 CH <sub>3</sub>        | 2.07 (3H, s)                                                     | 11.4 CH <sub>3</sub>        | 2.15 (3H, s)                  | 11.4 CH <sub>3</sub>        |
| 5-OMe | 3.76 (3H, s)                  | 61.6 CH <sub>3</sub>        | 3.71 (3H, s)                                                     | 61.6 CH <sub>3</sub>        | 3.76 (3H, s)                  | 61.5 CH <sub>3</sub>        |
| 1'    | 3.38 (2H, br d, J = 7.1 Hz)   | 23.6 CH <sub>2</sub>        | 3.32 (2H, br d, J = 6.9 Hz)                                      | 23.6 CH <sub>2</sub>        | 3.39 (2H, br d, J = 7.0 Hz)   | 23.6 CH <sub>2</sub>        |
| 2'    | 5.27 (1H, t, J = 7.1 Hz)      | 124.4 CH                    | 5.18 (1H, t, J = 6.9 Hz)                                         | 124.4 CH                    | 5.26 (1H, t, J = 7.0 Hz)      | 124.5 CH                    |
| 3'    | -                             | 135.2 C                     | -                                                                | 135.1 C                     | -                             | 135.1 C                     |
| 4'    | 2.28 (2H, m)                  | 36.6 CH <sub>2</sub>        | 2.13 (2H, m)                                                     | 36.5 CH <sub>2</sub>        | 2.27 (2H, m)                  | 36.5 CH <sub>2</sub>        |
| 5'    | 2.36 (2H, m)                  | 35.5 CH <sub>2</sub>        | 2.21 (2H, m)                                                     | 35.6 CH <sub>2</sub>        | 2.30 (2H, m)                  | 35.6 CH <sub>2</sub>        |
| 6'    | -                             | 175.8 C                     | -                                                                | 175.4 C                     | -                             | 175.3 C                     |
| 7'    | 1.83 (3H, s)                  | 16.3 CH <sub>3</sub>        | 1.73 (3H, s)                                                     | 16.2 CH <sub>3</sub>        | 1.82 (3H, s)                  | 16.3 CH <sub>3</sub>        |
| 2''   | 4.24 (1H, d, J = 5.5 Hz)      | 59.4 CH                     | 4.51 (1H, dd, J = 5.4, 8.2 Hz)                                   | 55.5 CH                     | 4.26 (1H, q, J = 7.2 Hz)      | 49.9 CH                     |
| 3''   | -                             | 175.8 C                     | -                                                                | 175.4 C                     | -                             | 176.8 C                     |
| 4''   | 2.10 (1H, m)                  | 31.8 CH                     | 2.77 (1H, dd, J = 8.2, 13.7 Hz); 3.03 (1H, dd, J = 5.4, 13.7 Hz) | 38.8 CH <sub>2</sub>        | 1.30 (3H, d, J = 7.2 Hz)      | 18.0 CH <sub>3</sub>        |
| 5''   | 0.90 (3H, d, J = 6.8 Hz)      | 19.7 CH <sub>3</sub>        | -                                                                | 138.7 C                     | -                             | -                           |
| 6''   | 0.90 (3H, d, J = 6.8 Hz)      | 18.4 CH <sub>3</sub>        | 7.12 (1H, m)                                                     | 130.3 C                     | -                             | -                           |
| 7''   | -                             | -                           | 7.19 (1H, m)                                                     | 129.3 C                     | -                             | -                           |
| 8''   | -                             | -                           | 7.14 (1H, m)                                                     | 127.6 C                     | -                             | -                           |
| 9''   | -                             | -                           | 7.19 (1H, m)                                                     | 129.3 C                     | -                             | -                           |
| 10''  | -                             | -                           | 7.12 (1H, m)                                                     | 130.3 C                     | -                             | -                           |

<sup>a</sup> Recorded at 400 MHz; <sup>b</sup> "m" means overlapped or multiplet with other signals; <sup>c</sup> Recorded at 100 MHz.
